# Supplementary material
Source: PubMed Central journal article supplement (PMC4327780)

# Supplementary Figure 1

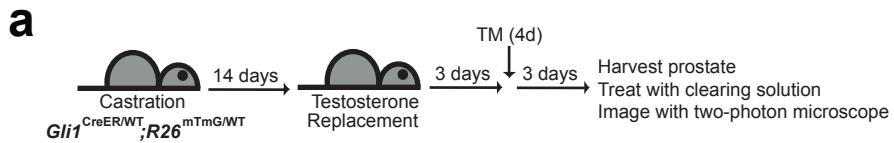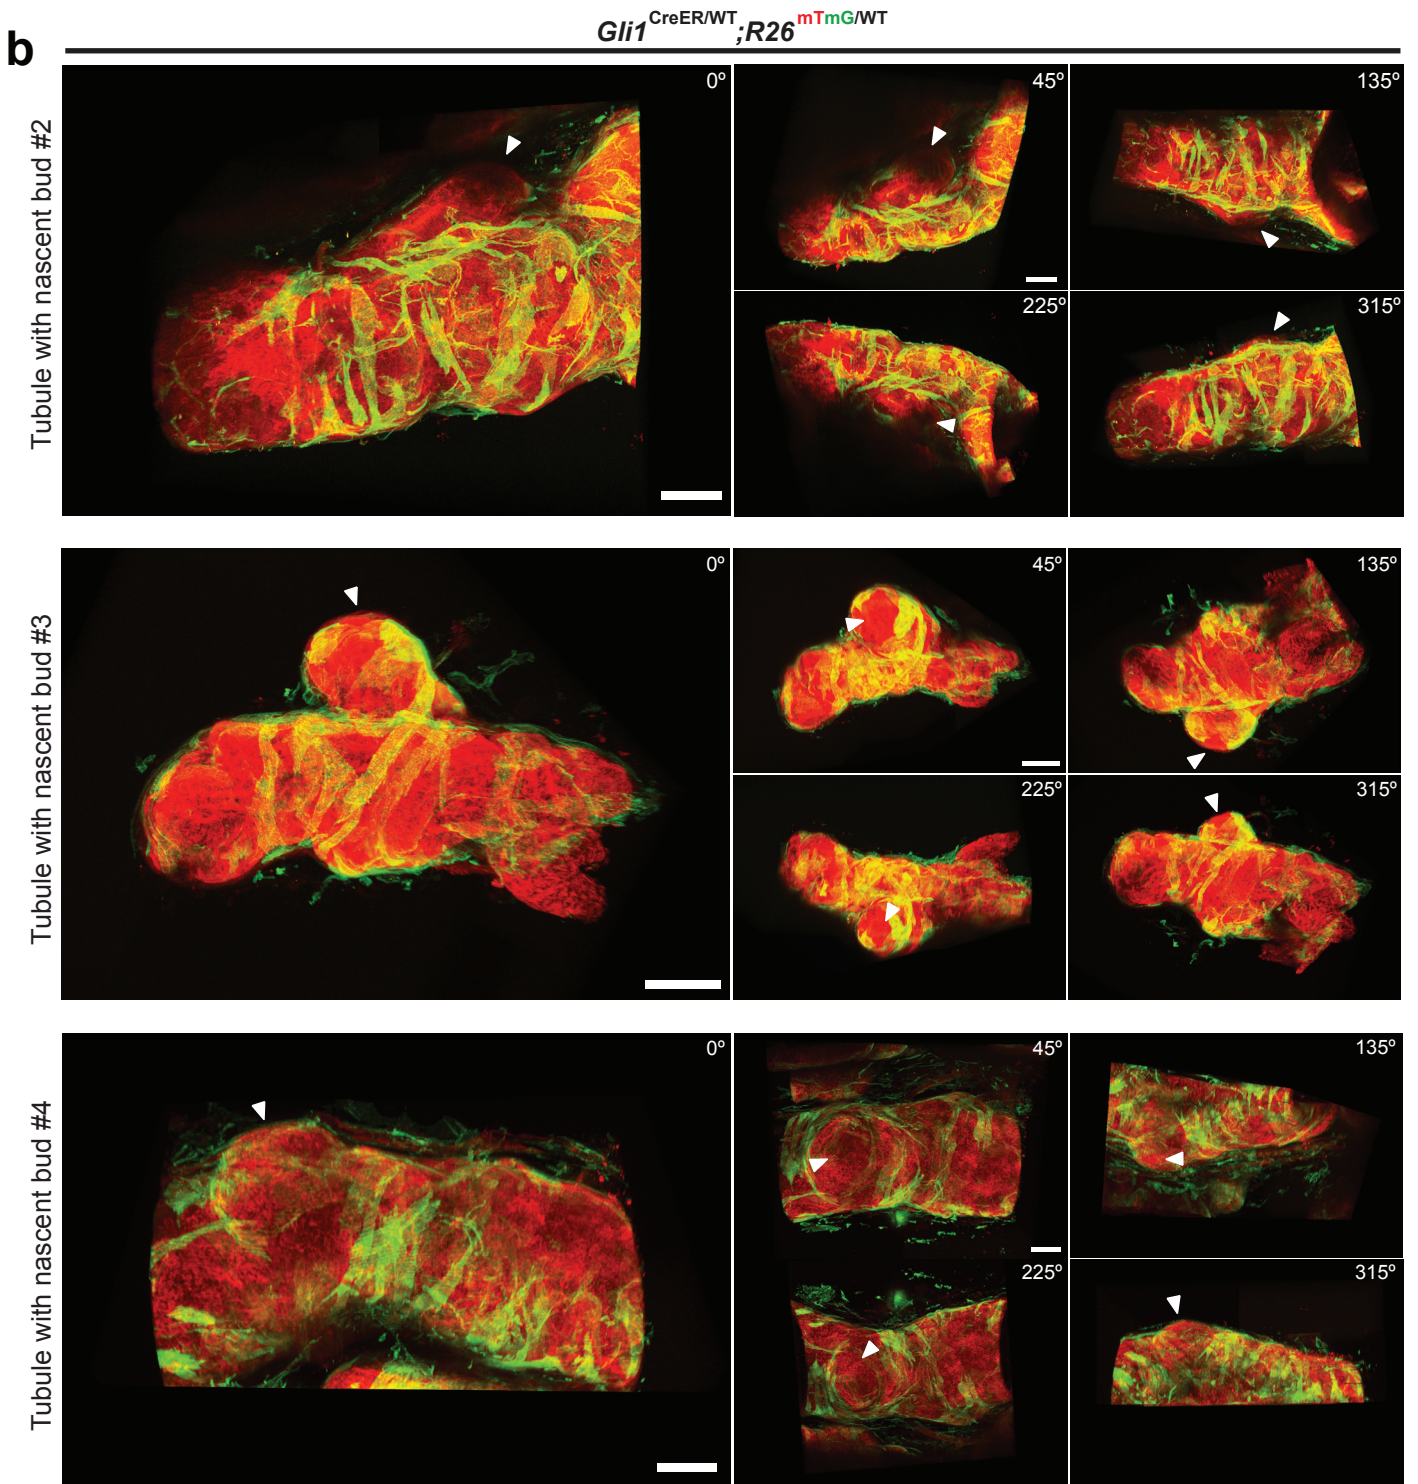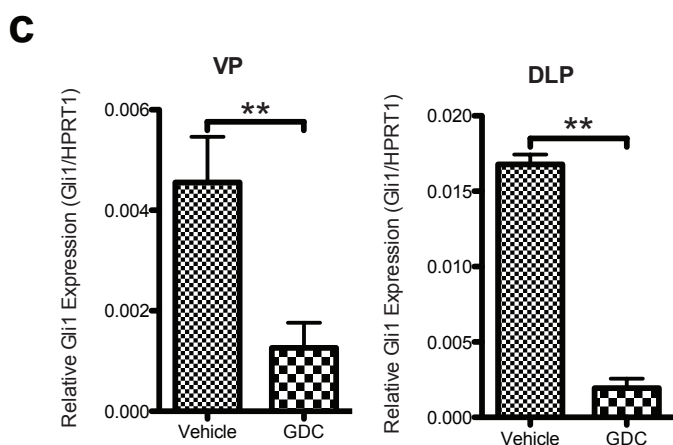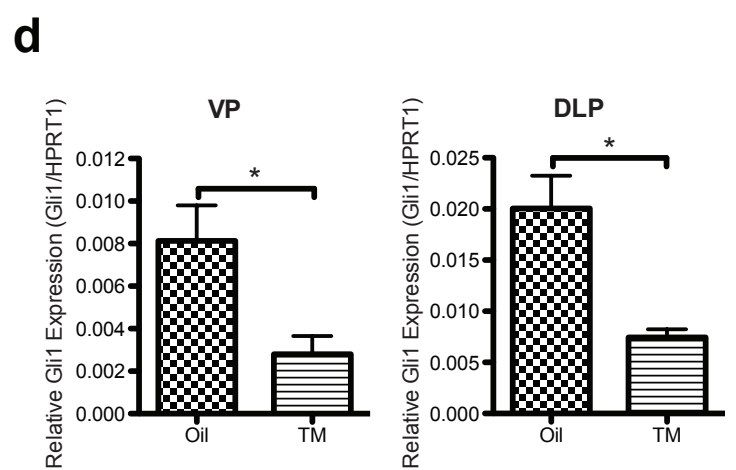

Supplement: NIHMS631701-supplement-2.pdf [file NIHMS631701-supplement-2.pdf]

# Supplementary Figure 2

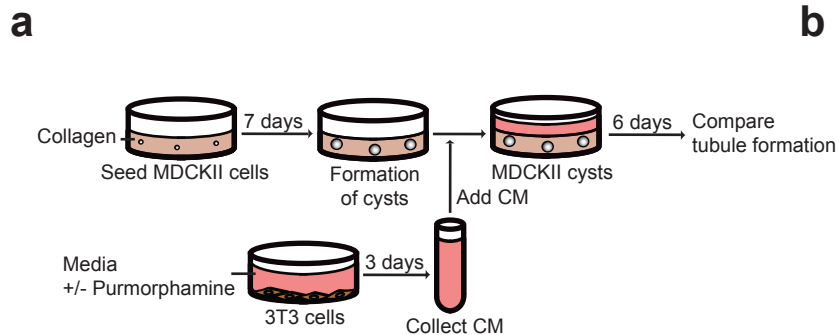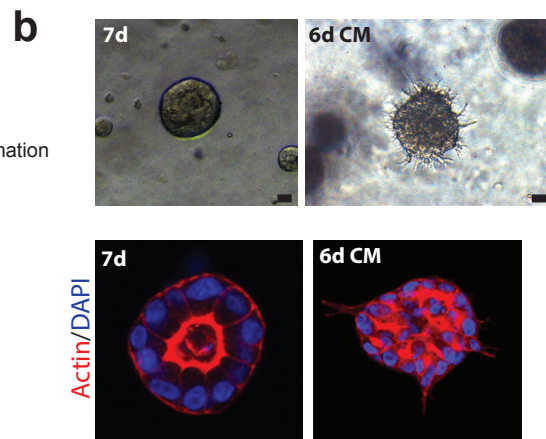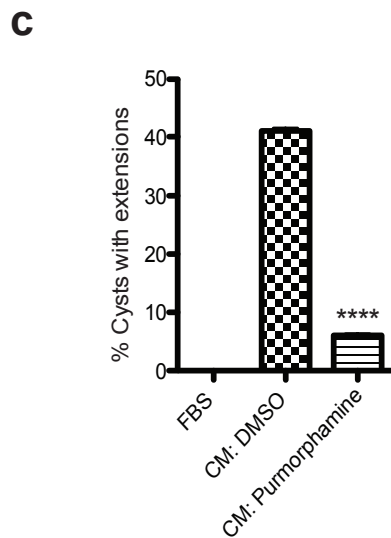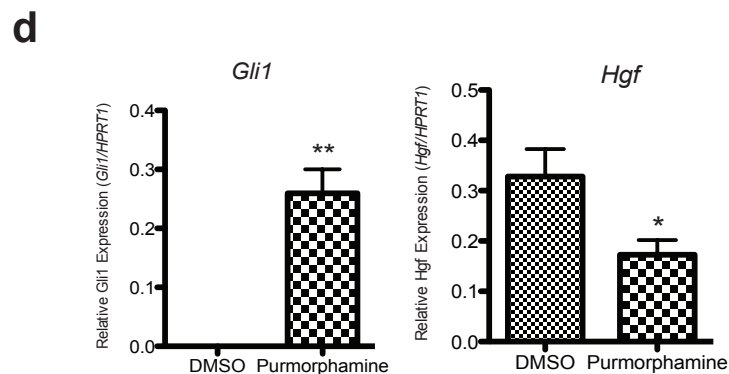

Supplement: NIHMS631701-supplement-3.pdf [file NIHMS631701-supplement-3.pdf]

# Supplementary Figure 3

**a**

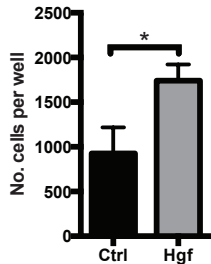

**b**

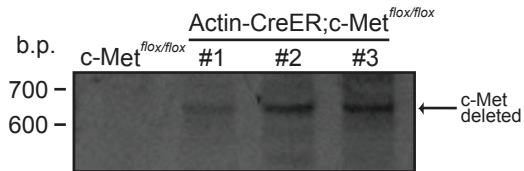

**c**

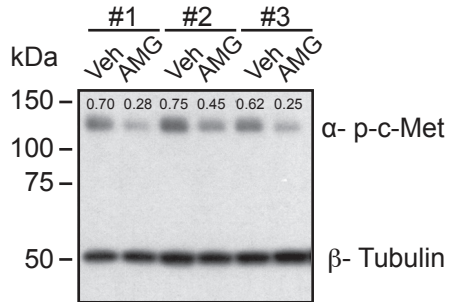

Supplement: NIHMS631701-supplement-4.pdf [file NIHMS631701-supplement-4.pdf]

# Supplementary Figure 4

**a**

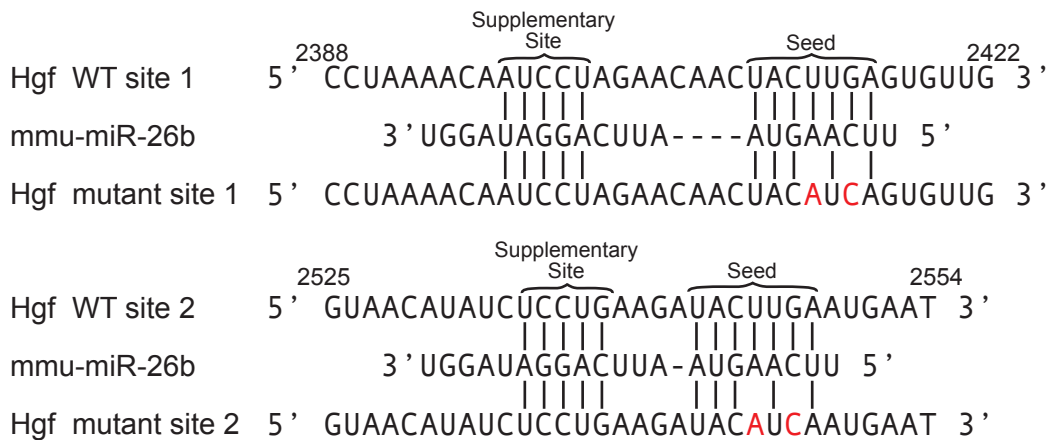

**b**

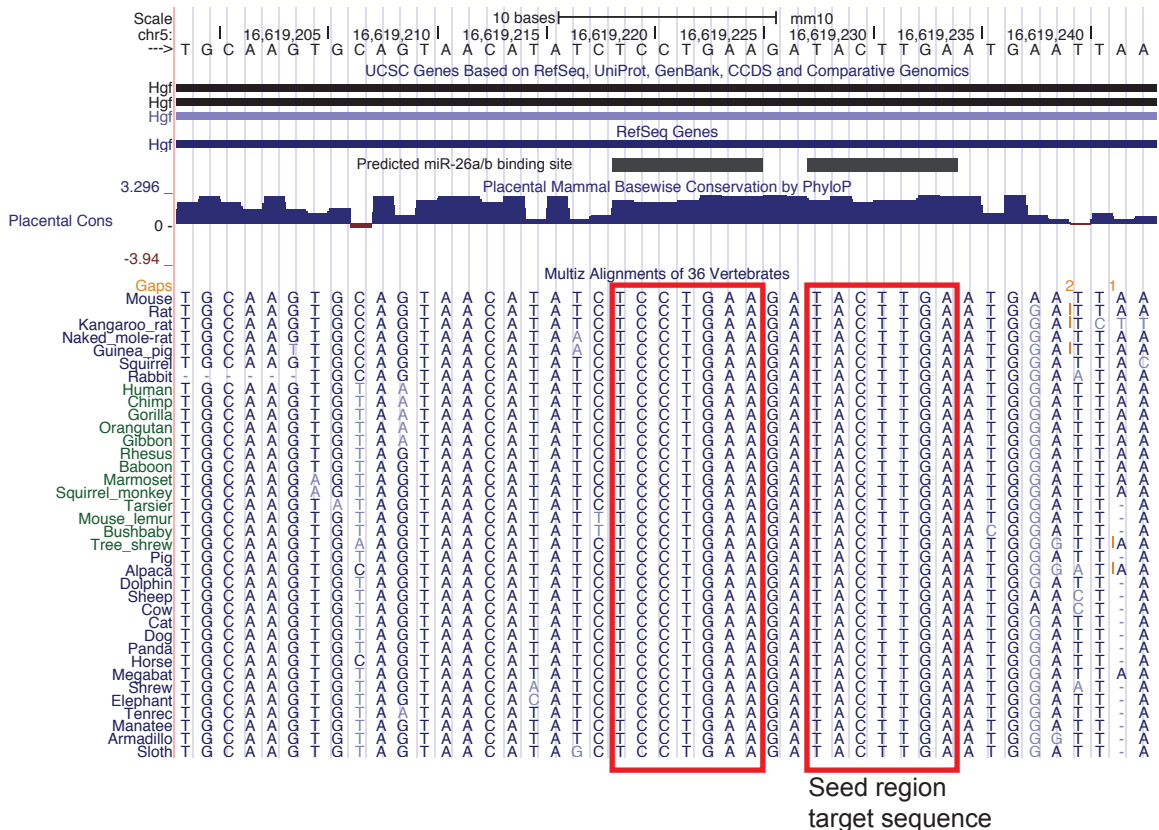

**c**

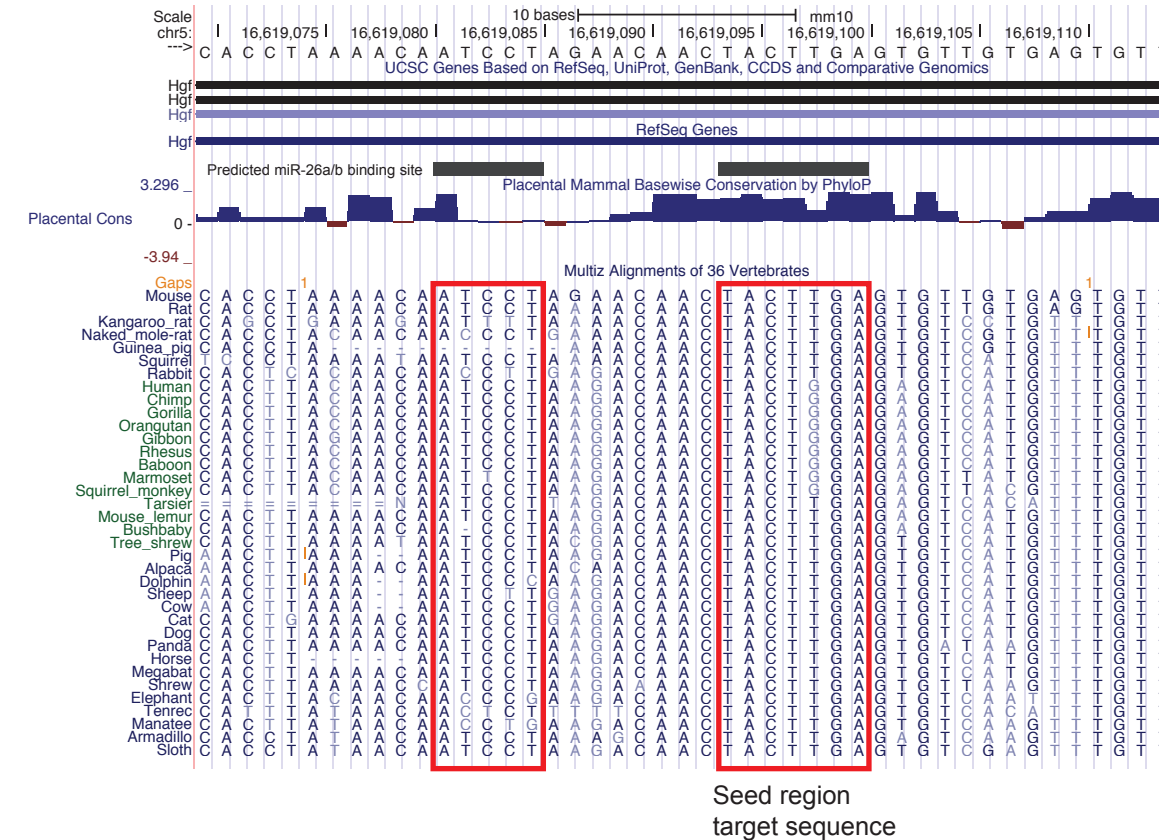

Supplement: NIHMS631701-supplement-5.pdf [file NIHMS631701-supplement-5.pdf]

# Supplementary Figure 5

**a**

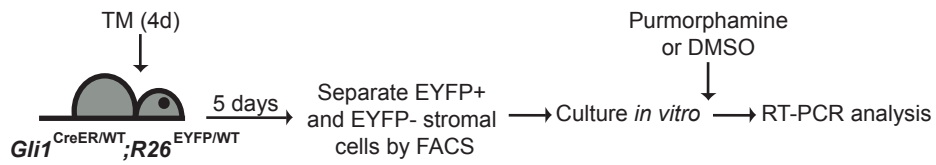

**b**

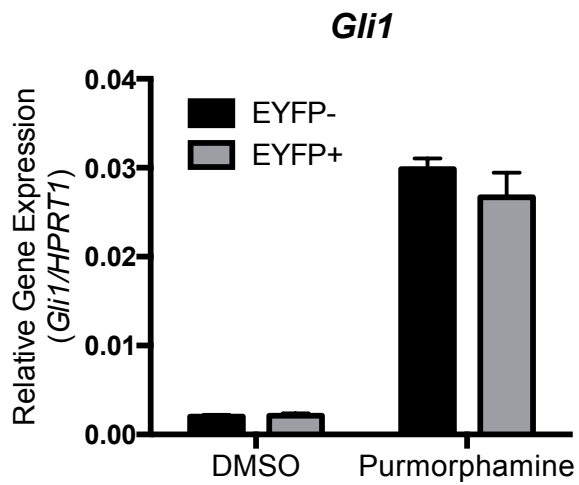

**c**

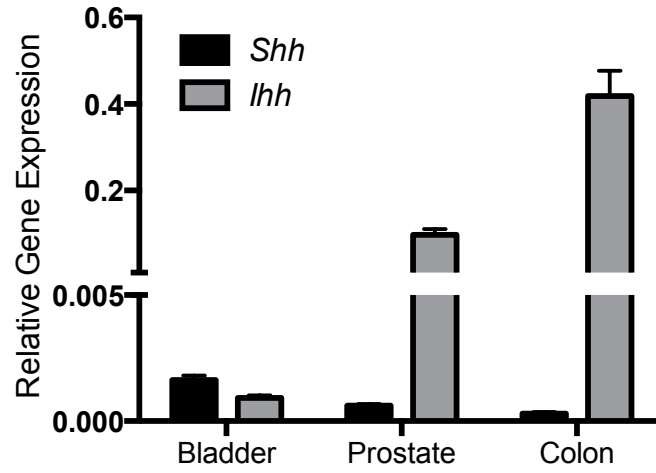

**d**

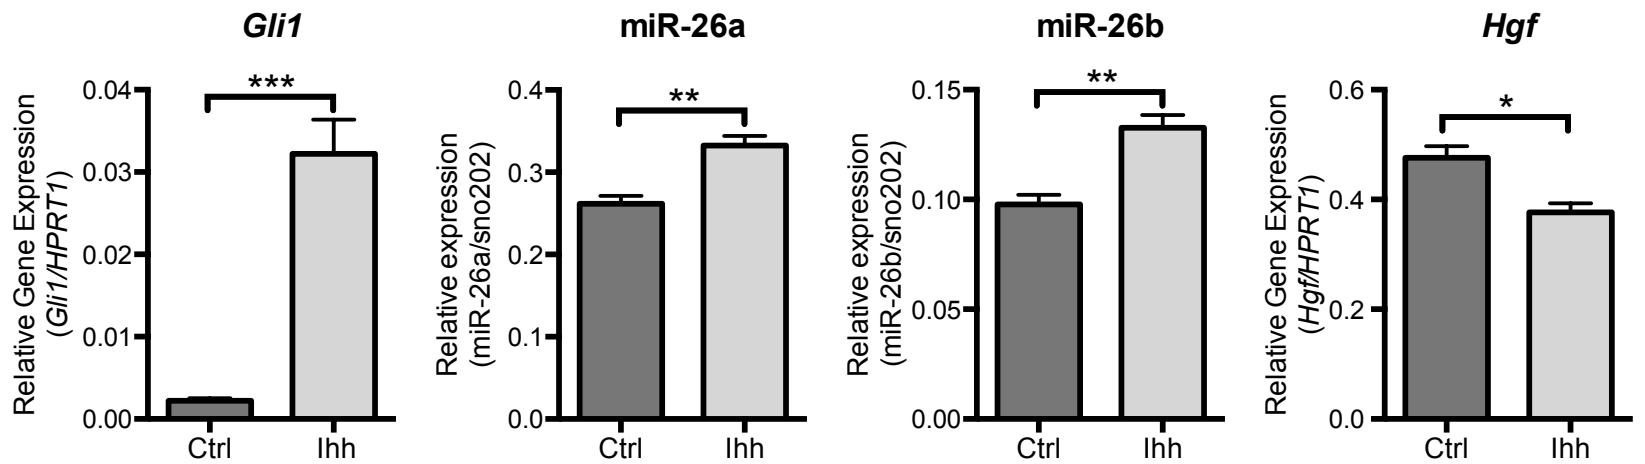

**e**

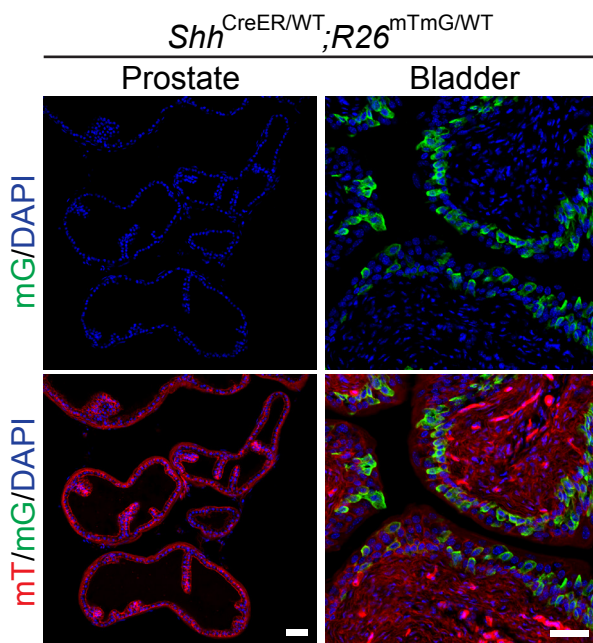

Supplement: NIHMS631701-supplement-6.pdf [file NIHMS631701-supplement-6.pdf]
